# Supplementary material for: Non-diagnostic Results of Percutaneous Transthoracic Needle Biopsy: A Meta-analysis
Source: PubMed Central journal article supplement (PMC6711972; doi:10.1038/s41598-019-48805-x), 2019-08-27

## SUPPLEMENTARY INFORMATION

**TITLE:** Non-diagnostic Results of Percutaneous Transthoracic Needle Biopsy: A Meta-analysis

**Authors' full names:** Kum Ju Chae<sup>1</sup>, Hyunsook Hong<sup>2</sup>, Soon Ho Yoon<sup>3</sup>, Seokyung Hahn<sup>4</sup>, Gong Yong Jin<sup>1</sup>, Chang Min Park<sup>3</sup>, Jin Mo Goo<sup>3,5</sup>

**Authors' affiliation(s):** <sup>1</sup>Department of Radiology, Institute of Medical Science, Research Institute of Clinical Medicine of Chonbuk National University-Biomedical Research Institute of Chonbuk National University Hospital; <sup>2</sup>Medical Research Collaborating Center, Seoul National University Hospital, Seoul, Korea; <sup>3</sup>Department of Radiology, Seoul National University College of Medicine, Seoul National University Hospital, Seoul, Korea; <sup>4</sup>Department of Medicine, Seoul National University College of Medicine, Seoul, Korea; <sup>5</sup>Institute of Radiation Medicine, Seoul National University Medical Research Center, Seoul, Korea

## Supplemental Tables

**Supplemental Table A1. Summary of characteristics of the included studies**

| Source                | Total biopsy No. | Lesion size (mm) <sup>a</sup> | Biopsy Needle <sup>b</sup> | Needle Guide <sup>c</sup> | Prevalence of malign. | Biopsy result                |       |                    |                 |                      |           | FU loss |
|-----------------------|------------------|-------------------------------|----------------------------|---------------------------|-----------------------|------------------------------|-------|--------------------|-----------------|----------------------|-----------|---------|
|                       |                  |                               |                            |                           |                       | Technically succeed biopsies |       |                    |                 |                      |           |         |
|                       |                  |                               |                            |                           |                       | Malignant PTNB result        |       | Benign PTNB result |                 |                      | Non-diag. |         |
|                       |                  |                               |                            |                           |                       | Specific malignancy          | Susp. | AAH                | Specific benign | Non-specific benign. |           |         |
| King, et al. 1967     | 59               | range, 15-150                 | FNA                        | F                         | 81.4%                 | 42/0                         | 0     |                    | 0               | 2/8                  | 4/3       | 0       |
| Nasiell, et al. 1967  | 144              | unknown                       | FNA                        | F                         | 60.1%                 | 60/0                         | 0     |                    | 0               | 16/39                | 7/16      | 6       |
| Stevens, et al. 1968  | 100              | unknown                       | FNA                        | F                         | 62.0%                 | 52/2                         | 4/0   |                    | 0/20            | 6/16                 |           | 0       |
| Pavy, et al. 1974     | 59               | range,20-85                   | FNA                        | F                         | 91.1%                 | 40/0                         | 3/0   |                    | 0               | 8/5                  |           | 3       |
| Francis, et al. 1977  | 244              | range, 5-150                  | FNA                        | F                         | 67.6%                 | 135/4                        | 0     |                    | 0/12            | 30/63                |           | 0       |
| House, et al. 1977    | 88               | mainly, 20-40                 | FNA                        | F                         | 64.7%                 | 53/1                         | 0     |                    | 0/11            | 2/18                 |           | 3       |
| Lalli, et al. 1978    | 1223             | unknown                       | FNA                        | F                         | 78.5%                 | 801/1                        | 0/2   | 144/256            |                 |                      |           | 19      |
| Flower, et al. 1979   | 300              | range, 10-100                 | FNA                        | F                         | 71.3%                 | 162/3                        | 15/3  |                    | 0/18            | 24/57                |           | 18      |
| Poe, et al. 1980      | 103              | range, 5-100                  | FNA                        | F                         | 77.7%                 | 63/1                         | 9/0   |                    | 0/2             | 8/20                 |           | 0       |
| Taft, et al. 1980     | 100              | unknown                       | FNA                        | F                         | 80.0%                 | 60/0                         | 6/1   |                    | 6/15            |                      | 8/4       | 0       |
| Westcott, et al. 1980 | 403              | range, >6                     | FNA                        | F                         | 73.3%                 | 284/4                        | 4/2   | 5/101              |                 |                      |           | 3       |
| Allison, et al. 1981  | 160              | unknown                       | FNA                        | F                         | 62.7%                 | 85/0                         | 0     |                    | 0/12            | 9/44                 |           | 10      |

|                         |     |                               |     |       |       |       |      |   |        |       |       |    |
|-------------------------|-----|-------------------------------|-----|-------|-------|-------|------|---|--------|-------|-------|----|
| Pak, et al. 1981        | 52  | range, 10-110                 | FNA | F     | 82.7% | 42/0  | 0    |   | 0/5    | 0/2   | 1/2   | 0  |
| Pilotti, et al. 1982    | 130 | range, 15-80                  | FNA | F     | 88.5% | 106/1 | 0    |   | 0/5    | 1/9   | 8/0   | 0  |
| Samuelsson, et al. 1982 | 412 | median, >20                   | FNA | F     | N/A   | *     | *    | * | *      | *     | 29†   | *  |
| Vine, et al. 1982       | 100 | unknown                       | FNA | F     | N/A   | 55/0  | 0    |   | 11†    | 25†   |       | 9  |
| Johnson, et al. 1983    | 200 | unknown                       | FNA | F     | 68.5% | 120/1 | 2/1  |   | 0/31   | 6/27  | 9/3   | 0  |
| McEvoy, et al. 1983     | 81  | unknown                       | CB  | F     | 86.1% | 59/0  | 2/0  |   | 0/4    | 0/5   | 7/2   | 2  |
| Harrison, et al. 1984   | 89  | range,<br>20-80 (89%)         | CB  | F     | 77.6% | 63/0  | 0    |   | 0/6    | 1/13  | 2/0   | 4  |
| Stevens, et al. 1984    | 348 | unknown                       | FNA | F     | 64.1% | 192/0 | 13/1 |   | 18/124 |       |       | 0  |
| Crosby, et al. 1985     | 180 | median,30-60                  | FNA | F     | N/A   | 109/0 | 7/0  |   | 0      | 35†   | 29†   | 0  |
| Greene, et al. 1985     | 150 | mean, 32-37<br>(range, 8-120) | FNA | F     | N/A   | 114/0 | 0    |   | 0/10   | 4/17  |       | 5  |
| Lees, et al. 1985       | 86  | unknown                       | FNA | F     | 82.7% | 57/0  | 0    |   | 10/14  |       |       | 5  |
| Nahman, et al. 1985     | 125 | unknown                       | FNA | F     | 85.1% | 101/1 | 0    |   | 0      | 1/17  | 1/0   | 4  |
| Calhoun, et al. 1986    | 397 | unknown                       | FNA | F     | 81.2% | 252/0 | 13/0 |   | 0/10   | 25/48 | 13/12 | 24 |
| Winning, et al. 1986    | 181 | mean, 39-46                   | FNA | F     | 76.4% | 97/0  | 0    |   | 0/4    | 29/35 |       | 16 |
| Stanley, et al. 1987    | 447 | unknown                       | FNA | F, CT | 73.4% | 312/4 | 0    |   | 0/44   | 11/69 |       | 7  |
| Weisbrod, et al. 1987   | 133 | unknown                       | FNA | F     | 71.4% | 69/0  | 1/0  |   | 0/3    | 20/33 |       | 7  |
| Balslov, et al. 1988    | 284 | unknown                       | CB  | F     | 72.5% | 161/0 | 0    |   | 0/53   | 1/10  | 44/15 | 0  |
| Levine, et al. 1988     | 59  | unknown                       | FNA | F     | 57.6% | 24/0  | 0    |   | 0/2    | 10/23 |       | 0  |
| Lovett, et al. 1988     | 92  | mean, 27<br>(15-90)           | FNA | F     | 85.9% | 71/0  | 0    |   | 0/4    | 0/9   | 8/0   | 0  |

|                           |     |                              |     |       |       |       |      |       |       |      |    |
|---------------------------|-----|------------------------------|-----|-------|-------|-------|------|-------|-------|------|----|
| Simpson, et al. 1988      | 233 | unknown                      | FNA | F     | 93.5% | 164/0 | 7/0  | 30/14 |       |      | 18 |
| Veale, et al. 1988        | 100 | unknown                      | FNA | F     | 87.0% | 73/0  | 3/0  | 0/8   | 6/5   | 5/0  | 0  |
| Collins, et al. 1992      | 129 | unknown                      | FNA | F     | 91.5% | 111/0 | 0    | 0/4   | 7/7   |      | 0  |
| Cristallini, et al. 1992  | 390 | unknown                      | FNA | F, CT | N/A   | 221/1 | 0    | 13/67 |       | 17†  | 71 |
| Zakowski, et al. 1992     | 164 | unknown                      | FNA | F, CT | 84.2% | 107/0 | 0    | 0/3   | 18/21 | 3/0  | 12 |
| Grode, et al. 1993        | 307 | unknown                      | FNA | F     | 77.9% | 141/0 | 16/0 | 0     | 82/68 |      | 0  |
| Burbank, et al. 1994      | 60  | unknown                      | CB  | CT    | 75.0% | 42/0  | 1/0  | 1/14  | 1/1   | 0    | 0  |
| Garcia, et al. 1994       | 84  | mean, 29±9a                  | FNA | CT    | 79.8% | 56/0  | 0    | 0/5   | 3/8   | 8/4  | 0  |
| Bocking, et al. 1995      | 340 | unknown                      | FNA | CT    | N/A   | 250/3 | 0    | *     | 3/59  | *    | 25 |
| Gasparini, et al. 1995    | 652 | mean, 35<br>(range, 8-80)    | FNA | F     | 77.3% | 425/1 | 0    | 0/61  | 31/72 |      | 62 |
| Milman, et al. 1995       | 103 | unknown                      | FNA | F     | 75.7% | 54/0  | 0    | 0     | 24/25 |      | 0  |
| Klein, et al. 1996        | 133 | mean, 29±22                  | CB  | F, CT | 63.8% | 77/0  | 0    | 0/28  | 0/14  | 4/4  | 6  |
| Li, et al. 1996           | 97  | median, >20<br>(range, 4-82) | FNA | CT    | 87.6% | 64/0  | 13/0 | 0     | 8/12  |      | 0  |
| Cattelani, et al. 1997    | 119 | median, 20-30                | FNA | CT    | 78.4% | 74/0  | 0    | 0/21  |       | 6/1  | 17 |
| Santambrogio, et al. 1997 | 110 | range, 10-30                 | FNA | CT    | 65.5% | 63/1  | 0    | 7/26  |       | 2/11 | 0  |
| Westcott, et al. 1997     | 75  | mean, 11<br>(range, <15)     | FNA | F, CT | 61.3% | 43/0  | 0    | 0/5   | 3/24  |      | 0  |
| Yankelevitz, et al. 1997  | 114 | median, 10-20                | FNA | CT    | 74.6% | 80/0  | 0    | 0/3   | 5/26  |      | 0  |
| Larscheid, et al. 1998    | 130 | median, 30-40                | FNA | CT    | 95.4% | 95/0  | 0    | 0/2   | 9/3   |      | 21 |
| Lucidarme, et al. 1998    | 91  | mean, 33<br>(range, 9-80)    | CB  | CT    | 84.3% | 70/0  | 0    | 0/10  | 4/3   | 1/1  | 2  |

|                                |     |                               |     |       |       |       |     |      |      |       |       |    |
|--------------------------------|-----|-------------------------------|-----|-------|-------|-------|-----|------|------|-------|-------|----|
| Swischuk, et al. 1998          | 612 | range, 3-100                  | FNA | F, CT | 76.3% | 430/2 | 0   |      | 0/55 | 15/75 | 5/8   | 22 |
| Charig, et al. 2000            | 185 | mean, 41.8<br>(range,13-112)  | CB  | CT    | 87.6% | 150/0 | 0   |      | 0/16 | 11/7  | 1/0   | 0  |
| Hirose, et al. 2000            | 48  | mean, 23<br>(range, 8-60)     | CB  | CTF   | 54.2% | 25/0  | 0   |      | 0/10 | 1/12  | 0     | 0  |
| Laurent, et al. 2000           | 202 | median, >20<br>(range, 8-140) | CB  | CT    | 79.8% | 149/0 | 0   |      | 0/20 | 9/20  |       | 4  |
| Lopez, et al. 2001             | 79  | median, 16-25                 | CB  | CT    | 63.3% | 48/0  | 1/0 |      | 0/8  | 1/21  |       | 0  |
| Arslan, et al. 2002            | 316 | mean, 39±16                   | FNA | CT    | 88.1% | 228/0 | 0   |      | 0/12 | 12/16 | 11/15 | 22 |
| Wallace, et al. 2002           | 61  | median,8-10<br>(range, 5-10)  | FNA | CT    | 68.4% | 29/0  | 3/0 | 7/18 |      |       |       | 4  |
| Yu, et al. 2002                | 52  | median, 54<br>(18-150)        | CB  | CT    | 91.2% | 30/0  | 0   |      | 0/0  | 1/3   | 0     | 18 |
| Anderson, et al. 2003          | 195 | mean, 41<br>(range, 8-100)    | FNA | CT    | 86.2% | 132/0 | 0   |      | 0/13 | 36/14 |       | 0  |
| Geraghty, et al. 2003          | 856 | mean, 30<br>(range, 4-150)    | FNA | CT    | N/A   | 526†  | 65† |      | 16†  | 221†  | 28†   | 0  |
| Yamagami, et al. 2003          | 110 | mean, 19±9<br>(range, 3-45)   | CB  | CTF   | 79.1% | 76/0  | 1/0 |      | 0/8  | 4/15  | 6/0   | 0  |
| Mullan, et al. 2004            | 53  | unknown                       | FNA | CT    | N/A   | *     | *   | *    | *    | *     | 9†    | *  |
| Savage, et al. 2004            | 836 | mean, 27<br>(range, 5-100)    | FNA | CT    | 90.2% | 741/0 | 0   |      | 0/21 | 7/46  | 6/15  | 0  |
| Gupta, et al. 2005             | 176 | median, 10-20<br>(range, <20) | FNA | CT    | N/A   | 104/0 | 0   |      | 5/34 |       | 21†   | 12 |
| Loubeyre, et al. 2005          | 75  | median, 30-40                 | CB  | CT    | 83.6% | 61/0  | 1/0 |      | 0/9  | 0/2   | 0     | 2  |
| Mazza, et al. 2005             | 321 | range, 5-80                   | FNA | CT    | N/A   | 229/2 | 8/0 |      | 0/16 | 1/19  | 46†   | 0  |
| Satoh, et al. 2005             | 60  | mean, 34<br>(range, 7-120)    | CB  | CT    | 75.0% | 33/0  | 0   | 0/1  | 0/14 | 1/7   | 2/2   | 0  |
| Bakhshayesh Karam, et al. 2006 | 505 | mean, 56<br>(range, 20-180)   | FNA | CT    | N/A   | *     | *   | *    | *    | *     | 95†   | *  |

|                          |      |                                 |     |       |       |       |      |        |      |       |       |     |
|--------------------------|------|---------------------------------|-----|-------|-------|-------|------|--------|------|-------|-------|-----|
| Lourenco, et al. 2006    | 89   | median, >38                     | FNA | CT    | N/A   | 52/0  | 3†   |        | 4†   | 0/13  | 4/2   | 11  |
| Quint, et al. 2006       | 226  | mean, 36±20<br>(range, 9-160)   | CB  | CT    | 83.6% | 154/0 | 3/0  |        | 0/7  | 5/16  | 11/11 | 19  |
| Halloush, et al. 2007    | 132  | unknown                         | FNA | F, CT | N/A   | *     | *    | *      | *    | *     | 2†    | *   |
| Priola, et al. 2007      | 612  | mean, 36<br>(range, 7-1103)     | FNA | CT    | 83.0% | 457/1 | 13†  |        | 0/21 | 16/48 | 35/21 | 0   |
| Billich, et al. 2008     | 130  | mean, 29                        | CB  | CT    | 77.7% | 99/0  | 0    |        | 0/4  | 0/23  | 2/2   | 0   |
| Heyer, et al. 2008       | 175  | mean, 46±30<br>(range, 9-157)   | CB  | CT    | 66.9% | 109/0 | 0    |        | 0/28 | 0/19  | 8/11  | 0   |
| Kim, et al. 2008         | 53   | mean, 19±9<br>(range, 7-45)     | CB  | CT    | 80.4% | 33/0  | 0    | 1/1    | 0/8  | 3/0   | 0     | 7   |
| Kurban, et al. 2008      | 102  | mean, 36<br>(range, 10-110)     | FNA | F     | 91.2% | 78/1  | 4/0  |        | 1/5  | 7/2   | 3/1   | 0   |
| Laspas, et al. 2008      | 409  | range, 6-100                    | FNA | CT    | N/A   | 290/0 | 3/1  |        | 0/6  | 25/44 | 40†   | 0   |
| Ng, et al. 2008          | 55   | mean, 9<br>(range, 5-10)        | FNA | CT    | 66.0% | 21/0  |      |        | 0/1  | 10/15 |       | 8   |
| Chakrabarti, et al. 2009 | 131  | median, 30-40                   | CB  | CT    | 83.8% | 80/0  | 0    |        | 0/3  | 29/18 |       | 1   |
| Guimaraes, et al. 2009   | 362  | mean, 51±24<br>(range, 9-140)   | FNA | CT    | N/A   | 204†  | 38/0 |        | 62†  |       | 53†   | 5   |
| Hiraki, et al. 2009      | 1105 | mean, 23±15<br>(range, 4-114)   | CB  | CTF   | 78.6% | 741/1 |      | 42/212 |      |       |       | 109 |
| Kothary, et al. 2009     | 139  | mean, 20-30<br>(range, 2-80)    | CB  | CT    | 72.6% | 77/0  | 13/5 |        | 0/17 | 8/15  |       | 4   |
| Min, et al. 2009         | 291  | mean, 31±19                     | CB  | F, CT | 54.4% | 133/0 | 10/6 |        | 0/55 | 2/46  | 9/22  | 8   |
| Saha, et al. 2009        | 57   | median, 51-100<br>range, 12-136 | FNA | CT    | 96.5% | 52/0  | 0    |        | 0/2  | 0     | 3/0   | 0   |
| Uskul, et al. 2009       | 164  | median, 50<br>(range, 13-110)   | FNA | CT    | 83.5% | 126/0 | 0    |        | 0/6  | 11/21 |       | 0   |
| Yildirim, et al. 2009    | 225  | mean, 41±20                     | CB  | CT    | N/A   | *     | *    | *      | *    | *     | 12†   | *   |

|                           |     |                               |     |         |       |       |      |       |      |       |      |    |    |
|---------------------------|-----|-------------------------------|-----|---------|-------|-------|------|-------|------|-------|------|----|----|
| Davoudi, et al. 2010      | 102 | unknown                       | FNA | CT      | N/A   | *     | *    | *     | *    | *     | 9†   | *  |    |
| Hur, et al. 2010          | 53  | mean, 26±10                   | FNA | CTF     | 60.4% | 27/0  | 0    |       | 4/19 |       | 1/2  | 0  |    |
| Kakizawa, et al. 2010     | 91  | mean, 26±10                   | CB  | CT      | N/A   | *     | *    | *     | *    | *     | 1†   | *  |    |
| Lee, et al. 2010          | 615 | mean, 36<br>(range, 5-136)    | CB  | F, CT   | N/A   | 336†  | 5/0  |       | 73†  | 201†  |      | 0  |    |
| Priola, et al. 2010       | 321 | mean, 37±21<br>(range, 7-103) | FNA | CT      | 81.6% | 227/1 | 0    |       | 0/29 | 35/29 |      | 0  |    |
| Schoellnast, et al. 2010  | 182 | mean, 30±20<br>(range, 5-120) | CB  | CT      | 74.7% | 132/1 | 0    |       | 0/21 | 4/24  |      | 0  |    |
| Gangopadhyay, et al. 2011 | 127 | range, 20-60                  | FNA | CT      | 78.7% | 96/0  | 2/0  |       | 0/15 | 0/12  | 2/0  | 0  |    |
| Guimaraes, et al. 2011    | 97  | unknown                       | CB  | CT      | N/A   | 60†   | 0    |       | 8†   | 15†   | 3†   | 11 |    |
| Kim, et al. 2011          | 142 | mean, 21<br>(range, 8-50)     | FNA | CTF, CT | 68.3% | 85/0  | 0    |       | 3/35 |       | 9/10 | 0  |    |
| Lee, et al. 2011          | 361 | mean, 29±9<br>(range, 5-90)   | FNA | CT      | 66.8% | 221/1 | 0    |       | 0/67 | 16/50 |      | 6  |    |
| Lima, et al. 2011         | 89  | unknown                       | FNA | CT      | 79.3% | 51/3  | 10/0 |       | 0/3  | 4/11  |      | 7  |    |
| Matsui, et al. 2011       | 394 | mean, 28±16<br>(range, 7-115) | CB  | CTF     | 79.9% | 262/0 |      | 17/70 |      |       |      |    | 45 |
| Yamauchi, et al. 2011     | 52  | median, 8-10<br>(range, <10)  | CB  | CTF     | N/A   | *     | *    | *     | *    | *     | 2†   | *  |    |
| Beslic, et al. 2012       | 242 | mean, 29<br>(range, 12-63)    | FNA | CT      | N/A   | *     | *    | *     | *    | *     | 33†  | *  |    |
| Braak, et al. 2012        | 84  | mean, 32<br>(range, 3-93)     | CB  | CBCT    | 83.3% | 63/0  | 1/0  |       | 0/4  | 0/9   | 6/1  | 0  |    |
| Inoue, et al. 2012        | 82  | mean, 12±4<br>(range, 5-35)   | CB  | CTF     | 88.4% | 50/0  | 0/0  | 8/0   | 0/8  | 1/0   | 2/0  | 13 |    |
| Maataoui, et al. 2012     | 135 | median, 20-30                 | CB  | CT      | N/A   | *     | *    | *     | *    | *     | 6†   | *  |    |
| McSweeney, et al. 2012    | 75  | mean, 31<br>(range, 7-107)    | CB  | CT      | N/A   | 48†   | 0    |       | 10†  | 13†   | 4†   | 0  |    |

|                           |     |                               |     |         |       |       |      |     |      |       |      |    |
|---------------------------|-----|-------------------------------|-----|---------|-------|-------|------|-----|------|-------|------|----|
| Nakatani, et al. 2012     | 107 | mean, 30<br>(range, 5-107)    | CB  | CT      | N/A   | *     | *    | *   | *    | *     | 2†   | *  |
| O'Neill, et al. 2012      | 164 | mean, 35-37                   | CB  | CTF     | N/A   | *     | *    | *   | *    | *     | 6†   | *  |
| Prosch, et al. 2012       | 326 | mean, 26-28<br>(range, 5-124) | CB  | CT, CTF | 78.5% | 192/2 | 9/53 |     |      |       | 70   |    |
| Uruga, et al. 2012        | 161 | unknown                       | FNA | CT      | 67.1% | 96/0  | 0    |     | 0/24 | 12/29 |      | 0  |
| Vijitsanguan, et al. 2012 | 94  | mean, 46±22<br>(range, 9-110) | FNA | CT      | 64.8% | 54/0  | 0/1  |     | 0/9  | 3/16  | 0/5  | 6  |
| Yoshimatsu, et al. 2012   | 116 | mean, 17-21<br>(range, 4-80)  | CB  | CTF     | N/A   | *     | *    | *   | *    | *     | 9†   | *  |
| Asai, et al. 2013         | 102 | mean, 28<br>(range, 10-85)    | CB  | CT      | N/A   | *     | *    | *   | *    | *     | 10†  | *  |
| Choi, et al. 2013         | 305 | mean, 9±1<br>(range, 5-10)    | CB  | CT      | 61.6% | 148/1 | 0    |     | 3/29 | 8/52  | 6/21 | 37 |
| De Filippo, et al. 2013   | 198 | range, 7-30                   | FNA | CT      | N/A   | 91/6  | 0    |     | 0/4  | 17†   | 41†  | 39 |
| Li, et al. 2013           | 169 | median, 11-15<br>(range, <20) | CB  | CTF     | 67.5% | 103/0 | 0    |     | 0/47 | 11/8  | 0    | 0  |
| Loh, et al. 2013          | 399 | mean, 37<br>(range, 6-123)    | FNA | CT      | N/A   | 269/0 | 3/0  |     | 0/53 | 0/45  | 29†  | 0  |
| Malone, et al. 2013       | 242 | median, 18-19                 | CB  | CT      | N/A   | 148†  | 11†  |     | 53†  | 30†   |      | 0  |
| Min, et al. 2013          | 440 | mean, 37-40                   | CB  | CT      | N/A   | *     | *    | *   | *    | *     | 22†  | *  |
| Mondal, et al. 2013       | 130 | unknown                       | FNA | CT      | N/A   | *     | *    | *   | *    | *     | 6†   | *  |
| Poulou, et al. 2013       | 994 | mean, 37±24                   | FNA | CT      | N/A   | 506†  | 0    |     | 29†  | 425†  | 34†  | 0  |
| Sconfienza, et al. 2013   | 170 | mean, 24±8                    | CB  | CT      | N/A   | *     | *    | *   | *    | *     | 6†   | *  |
| Tachibana, et al. 2013    | 270 | mean, 31-32<br>(range, 8-11)  | CB  | CT      | 77.8% | 184/1 | 5/0  | 1/1 | 0/14 | 20/44 | 0    | 0  |
| Tuna, et al. 2013         | 105 | unknown                       | CB  | CT      | 91.8% | 82/0  | 0    |     | 0/5  | 7/3   |      | 8  |



|                                  |      |                                 |     |      |       |       |        |     |       |        |       |      |
|----------------------------------|------|---------------------------------|-----|------|-------|-------|--------|-----|-------|--------|-------|------|
| Yamagami, et al. 2013            | 85   | mean, 14±6<br>(range, 4-30)     | CB  | CTF  | N/A   | 58/0  | 0      | 2/0 | 8†    | 13†    | 4†    | 0    |
| Zhuang, et al. 2013              | 102  | mean, 36<br>(range, 10-70)      | FNA | CT   | 78.4% | 72/0  | 4/2    |     | 0/9   | 1/10   | 1/3   | 0    |
| Floridi, et al. 2014             | 100  | mean, 51<br>(range, 7-140)      | CB  | CBCT | N/A   | 68/0  | 0      |     | 0/11  | 7/9    | 5†    | 0    |
| Guimaraes, et al. 2014           | 459  | mean, 42±24                     | FNA | CT   | N/A   | *     | *      | *   | *     | *      | 61†   | *    |
| Jiao, et al. 2014                | 108  | mean, 46±29                     | CB  | CBCT | 84.3% | 88/0  | 0      |     | 1/3   | 2/14   | 0     | 0    |
| Konjengbam, et al. 2014          | 61   | unknown                         | FNA | CT   | N/A   | 38†   | 2†     |     | 4†    | 12†    | 5†    | 0    |
| Kravtsov, et al. 2014            | 245  | unknown                         | FNA | CT   | 85.3% | 190/0 | 0      |     | 0/1   | 19/35  |       | 0    |
| Lee, et al. 2014                 | 1148 | mean, 27±17<br>(range, 5-130)   | CB  | CBCT | 71.0% | 720/0 | 16/0   |     | 1/107 | 16/174 | 14/33 | 67   |
| Mendiratta-Lala, et al. 2014     | 169  | mean, 24<br>(range, 9-67)       | CB  | CTF  | N/A   | *     | *      | *   | *     | *      | 25†   | *    |
| Patel, et al. 2014               | 174  | mean, 27±21<br>(range, 3-114)   | CB  | CT   | N/A   | *     | *      | *   | *     | *      | 27†   | *    |
| Shrestha, et al. 2014            | 252  | unknown                         | FNA | CT   | N/A   | 210†  | 0      |     | 19†   | 11†    | 9/3   | 0    |
| Wang, et al. 2014                | 345  | mean, 41<br>(range, 8-134)      | CB  | CT   | 83.7% | 250/0 | 0      | 3/0 | 7/50  |        | 7/2   | 26   |
| Busso, et al. 2015               | 824  | mean, 36<br>(range, 6-150)      | CB  | CT   | 87.7% | 497/0 | 0      |     | 0/16  | 14/50  | 4/6   | 237  |
| Fontaine-Delaruelle, et al. 2015 | 980  | median, 30                      | CB  | CT   | 90.4% | 776/1 | 0      |     | 7/42  | 24/22  | 62/27 | 19   |
| Jaconi, et al. 2015              | 375  | mean, 39±25<br>(range, 7-190)   | CB  | CBCT | N/A   | 283/0 | 0      |     | 0/46  | 18†    | 28†   | (3)‡ |
| Schulze, et al. 2015             | 571  | median, 20-30<br>(range, 4-100) | CB  | CT   | 67.6% | 365/0 | 14/182 |     |       |        |       | 10   |
| Takeshita, et al. 2015           | 750  | mean, 24±15                     | FNA | CT   | N/A   | 541/1 | 0      |     | 0/51  | 51/96  | 10†   | 0    |
| Yaffe, et al. 2015               | 181  | mean, 24±19                     | CB  | CT   | 92.5% | 146/1 | 5/0    |     | 0/9   | 9/3    |       | 8    |

|                     |     |                               |     |           |       |       |      |  |      |       |                 |    |
|---------------------|-----|-------------------------------|-----|-----------|-------|-------|------|--|------|-------|-----------------|----|
| Haas, et al. 2016   | 660 | mean, 31<br>(IQR, 17-40)      | FNA | CT        | 81.7% | 471/0 | 0    |  | 0/50 | 42/65 |                 | 32 |
| Rotolo, et al. 2016 | 324 | mean, 19<br>(range, 4-30)     | CB  | CBCT, CTF | N/A   | 189/0 | 0    |  | 0/76 | 17/0  | 28 <sup>†</sup> | 14 |
| Sangha, et al. 2016 | 251 | mean, 30-32<br>(range, 7-104) | CB  | CT        | 80.1% | 141/0 | 26/5 |  | 0/10 | 14/17 | 20/18           | 0  |

Abbreviations: AAH = atypical adenomatous hyperplasia; N/A = not available; FU = follow-up; PTNB = percutaneous transthoracic needle biopsy; <sup>a</sup>Size indicates a mean or median size; <sup>b</sup>CB = core biopsy; FNA = fine needle aspiration; <sup>c</sup>F = fluoroscopy; CBCT= cone beam CT; CTF = CT fluoroscopy. Data in cells indicates the number of biopsy. The fractional representation means final malignancy/final benign result.

\*Data cannot be extracted.

†Data cannot be separated into final benign or malignancy.

‡Among the 18 non-specific and 28 non-diagnostic results, 3 did not have final result.

**Supplemental Table A2. Meta-regression analysis for the incidence of pathologic reports of PTNB results**

|                                                            | Group 1       |                |                  | Group 2       |                |                  | Group 3       |                |                  | Univariate   | Multivariate |
|------------------------------------------------------------|---------------|----------------|------------------|---------------|----------------|------------------|---------------|----------------|------------------|--------------|--------------|
|                                                            | Incidence (%) | I <sup>2</sup> | Included studies | Incidence (%) | I <sup>2</sup> | Included studies | Incidence (%) | I <sup>2</sup> | Included studies | P value      | P value      |
| <b>Non-diagnostic results</b>                              |               |                |                  |               |                |                  |               |                |                  |              |              |
| Biopsy needle<br>( <i>FNA vs CB</i> )                      | 8.0           | 0.90           | 58               | 5.5           | 0.90           | 48               |               |                |                  | <u>0.010</u> | <u>0.015</u> |
| Guiding method<br>( <i>Fluoroscopy vs CT/CBCT vs CTF</i> ) | 8.3           | 0.80           | 22               | 5.5           | 0.92           | 72               | 6.5           | 0.66           | 12               | <u>0.041</u> | 0.412        |
| Lesion size<br>( <i>&lt;20mm vs ≥20mm</i> )                | 9.0           | 0.87           | 10               | 6.6           | 0.91           | 96               |               |                |                  | 0.261        | 0.087        |
| Publication year<br>( <i>&lt;2000 vs ≥2000</i> )           | 7.7           | 0.87           | 31               | 6.5           | 0.91           | 75               |               |                |                  | 0.308        | 0.547        |
| <b>Specific malignancy</b>                                 |               |                |                  |               |                |                  |               |                |                  |              |              |
| Biopsy needle<br>( <i>FNA vs CB</i> )                      | 67.5          | 0.93           | 75               | 69.7          | 0.92           | 47               |               |                |                  | 0.285        | 0.659        |
| Guiding method<br>( <i>Fluoroscopy vs CT/CBCT vs CTF</i> ) | 66.3          | 0.91           | 37               | 70.5          | 0.92           | 74               | 66.8          | 0.81           | 11               | 0.114        | 0.282        |
| Lesion size<br>( <i>&lt;20mm vs ≥20mm</i> )                | 62.8          | 0.46           | 13               | 69.0          | 0.93           | 109              |               |                |                  | 0.057        | <u>0.015</u> |

|                                                                |      |      |    |      |      |    |     |   |   |                  |              |
|----------------------------------------------------------------|------|------|----|------|------|----|-----|---|---|------------------|--------------|
| Publication year<br>( <i>&lt;2000 vs ≥2000</i> )               | 66.9 | 0.89 | 50 | 69.4 | 0.94 | 72 |     |   |   | 0.178            | 0.903        |
| <b>Atypia or Suspicious<br/>for malignancy</b>                 |      |      |    |      |      |    |     |   |   |                  |              |
| Biopsy needle<br>( <i>FNA vs CB</i> )                          | 3.5  | 0.88 | 29 | 2.9  | 0.79 | 16 |     |   |   | 0.570            | 0.430        |
| Guiding method<br>( <i>Fluoroscopy vs<br/>CT/CBCT vs CTF</i> ) | 2.9  | 0.79 | 17 | 2.9  | 0.88 | 27 | 7.6 | - | 1 | 0.626            | 0.492        |
| Lesion size<br>( <i>&lt;20mm vs ≥20mm</i> )                    | 3.1  | 0.68 | 3  | 3.2  | 0.87 | 42 |     |   |   | 0.816            | 0.899        |
| Publication year<br>( <i>&lt;2000 vs ≥2000</i> )               | 3.4  | 0.85 | 18 | 3.3  | 0.86 | 27 |     |   |   | 0.964            | 0.568        |
| <b>Atypical<br/>adenomatous<br/>hyperplasia</b>                |      |      |    |      |      |    |     |   |   |                  |              |
| Lesion size<br>( <i>&lt;20mm vs ≥20mm</i> )                    | 5.2  | 0.59 | 3  | 0.9  | 0.00 | 3  |     |   |   | <u>0.032</u>     | N/A          |
| <b>Specific benign<br/>results</b>                             |      |      |    |      |      |    |     |   |   |                  |              |
| Biopsy needle<br>( <i>FNA vs CB</i> )                          | 5.1  | 0.91 | 57 | 9.8  | 0.89 | 37 |     |   |   | <u>&lt;0.001</u> | <u>0.001</u> |

|                                                            |      |      |    |      |      |    |      |      |   |              |              |
|------------------------------------------------------------|------|------|----|------|------|----|------|------|---|--------------|--------------|
| Guiding method<br>( <i>Fluoroscopy vs CT/CBCT vs CTF</i> ) | 3.8  | 0.93 | 29 | 6.4  | 0.92 | 61 | 14.7 | 0.80 | 4 | <u>0.006</u> | 0.443        |
| Lesion size<br>( <i>&lt;20mm vs ≥20mm</i> )                | 10.0 | 0.91 | 10 | 6.5  | 0.92 | 84 |      |      |   | 0.129        | 0.132        |
| Publication year<br>( <i>&lt;2000 vs ≥2000</i> )           | 5.2  | 0.91 | 37 | 7.9  | 0.92 | 57 |      |      |   | <u>0.040</u> | 0.689        |
| <b>Nonspecific benign results</b>                          |      |      |    |      |      |    |      |      |   |              |              |
| Biopsy needle<br>( <i>FNA vs CB</i> )                      | 16.2 | 0.96 | 35 | 11.9 | 0.90 | 32 |      |      |   | <u>0.039</u> | <u>0.035</u> |
| Guiding method<br>( <i>Fluoroscopy vs CT/CBCT vs CTF</i> ) | 12.2 | 0.87 | 16 | 13.2 | 0.92 | 44 | 13.3 | 0.92 | 7 | 0.926        | 0.375        |
| Lesion size<br>( <i>&lt;20mm vs ≥20mm</i> )                | 11.0 | 0.91 | 7  | 14.5 | 0.94 | 60 |      |      |   | 0.290        | 0.491        |
| Publication year<br>( <i>&lt;2000 vs ≥2000</i> )           | 14.2 | 0.90 | 23 | 14.1 | 0.95 | 44 |      |      |   | 0.942        | 0.918        |

Definition of abbreviations: PTNB = percutaneous transthoracic needle biopsy; FNA = fine needle aspiration, CB = core biopsy, N/A = not available. P values underlined in italic type indicate statistical significance.

**Supplemental Table A3. Sensitivity and specificity in 2-by-2, 3-by-2 table analyses, and incidence of non-diagnostic results in malignancy and benign disease**

**Sensitivity in 3 by 2 table:**

$$\begin{aligned} & \frac{\text{The number of procedures with final malignancy and a positive biopsy result (a)}}{\text{The number of technically succeeded procedures with final malignancy (a + e + c)}} \\ &= \frac{\frac{a}{(a + c)}}{\frac{(a + e + c)}{(a + c)}} = \frac{\text{Sensitivity in 2 by 2 table}}{\frac{(a + e + c)}{(a + c)}} = \frac{\text{Sensitivity in 2 by 2 table} * (a + c)}{(a + e + c)} \\ &= \text{Sensitivity in 2 by 2 table} * \left(1 - \frac{e}{a + e + c}\right) \\ &= \text{Sensitivity in 2 by 2 table} * [1 - \text{Incidence of non-diagnostic results in malignancy}] \end{aligned}$$

**Specificity in 3 by 2 table:**

$$\begin{aligned} & \frac{\text{The number of procedures with final benign result and a negative biopsy result (d)}}{\text{The number of technically succeeded procedures with final benign result (b + f + d)}} \\ &= \frac{\frac{b}{(b + d)}}{\frac{(b + f + d)}{(b + d)}} = \frac{\text{Specificity in 2 by 2 table}}{\frac{(b + f + d)}{(b + d)}} = \frac{\text{Specificity in 2 by 2 table} * (b + d)}{(b + f + d)} \\ &= \text{Specificity in 2 by 2 table} * \left(1 - \frac{f}{b + f + d}\right) \\ &= \text{Specificity in 2 by 2 table} * [1 - \text{Incidence of non-diagnostic results in benign disease}] \end{aligned}$$

**Supplemental Table A4.**

**OVID/MEDLINE Search Strategy**

1. exp Lung/

2. Lung.mp

3. Pulmonary.mp

4. \$thoracic.mp

5. \$thorax.mp

6. Consolidation\$.mp

7. 1 or 2 or 3 or 4 or 5 or 6

8. exp biopsy/

9. Biops\$.mp

10. Aspiration\$.mp

11. Sampling\$.mp

12. 8 or 9 or 10 or 11

13. exp "Diagnostic accuracy"/

14. Diagnos\$.mp

15. Accurac\$.mp

16. Specificit\$.mp

17. Sensitivit\$.mp

18. Complication\$.mp

19. Pneumothorax.mp

20. Hemoptysis.mp

21. 13 or 14 or 15 or 16 or 17 or 18 or 19 or 20

22. 7 and 12 and 21

23. limit 22 to (English language and humans)

### **EMBASE Search Strategy**

#1. Lung

#2. Pulmonary

#3. \*thoracic

#4. \*thorax

#5. Consolidation\*

#6. #1 OR #2 OR #3 OR #4 OR #5

#7. Biops\*

#8. Aspiration\*

#9. Sampling\*

#10. #7 OR #8 OR #9



#11. Diagnos\*

#12. Accurac\*

#13. Specificit\*

#14. Sensitivit\*

#15. Complication\*

#16. Pneumothorax\*

#17. Hemoptysis\*

#18. #11 OR #12 OR #13 OR #14 OR #15 OR #16 OR #17

#19. #6 AND #10 AND #18

#20. #19 AND [human]/lim AND [English]/lim

Supplemental Figures

Supplemental Figure A1. Quality assessment of included studies

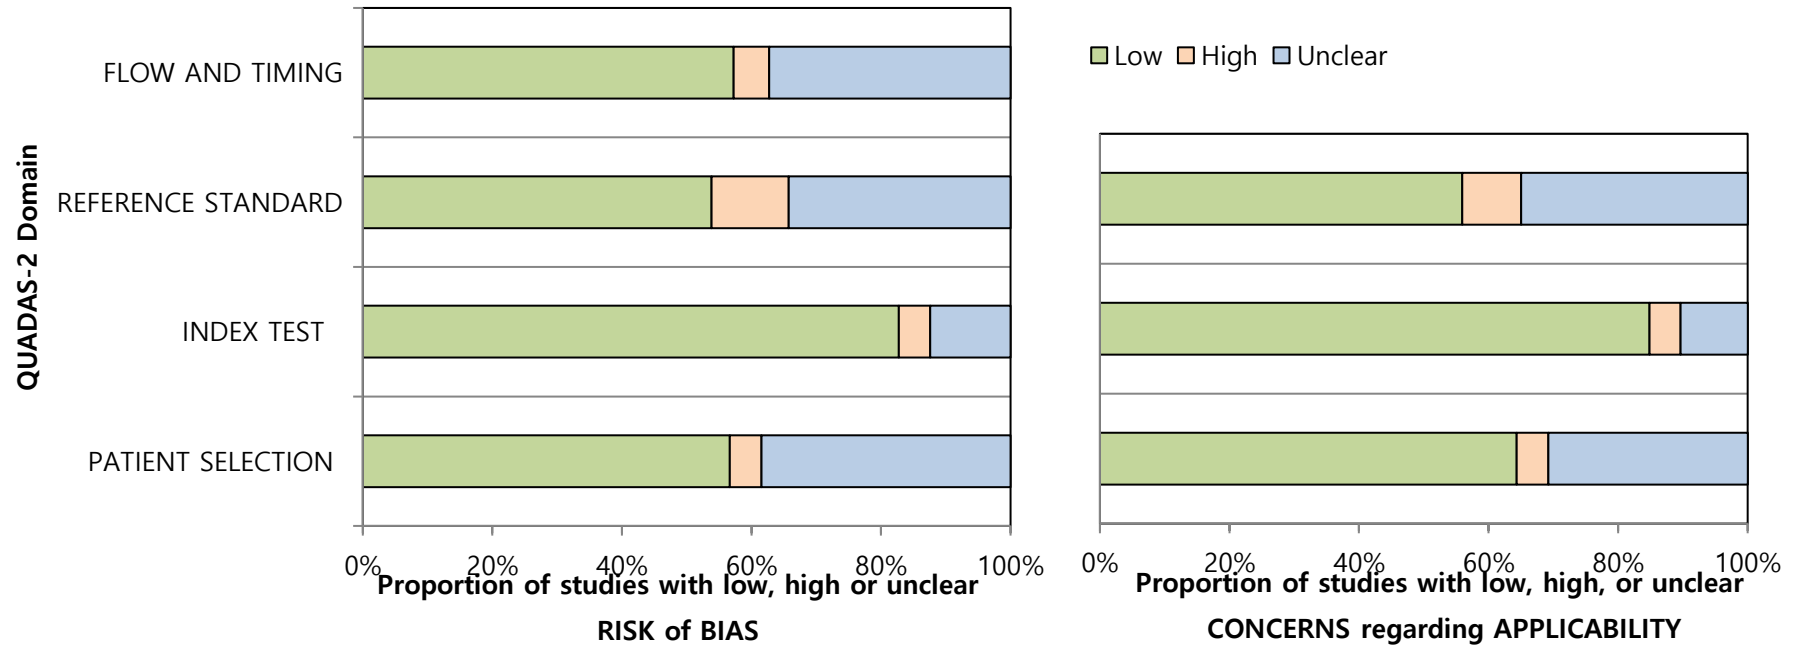

**Supplemental Figure A2. Forest plots of prevalence, sensitivity and specificity according to each approach**

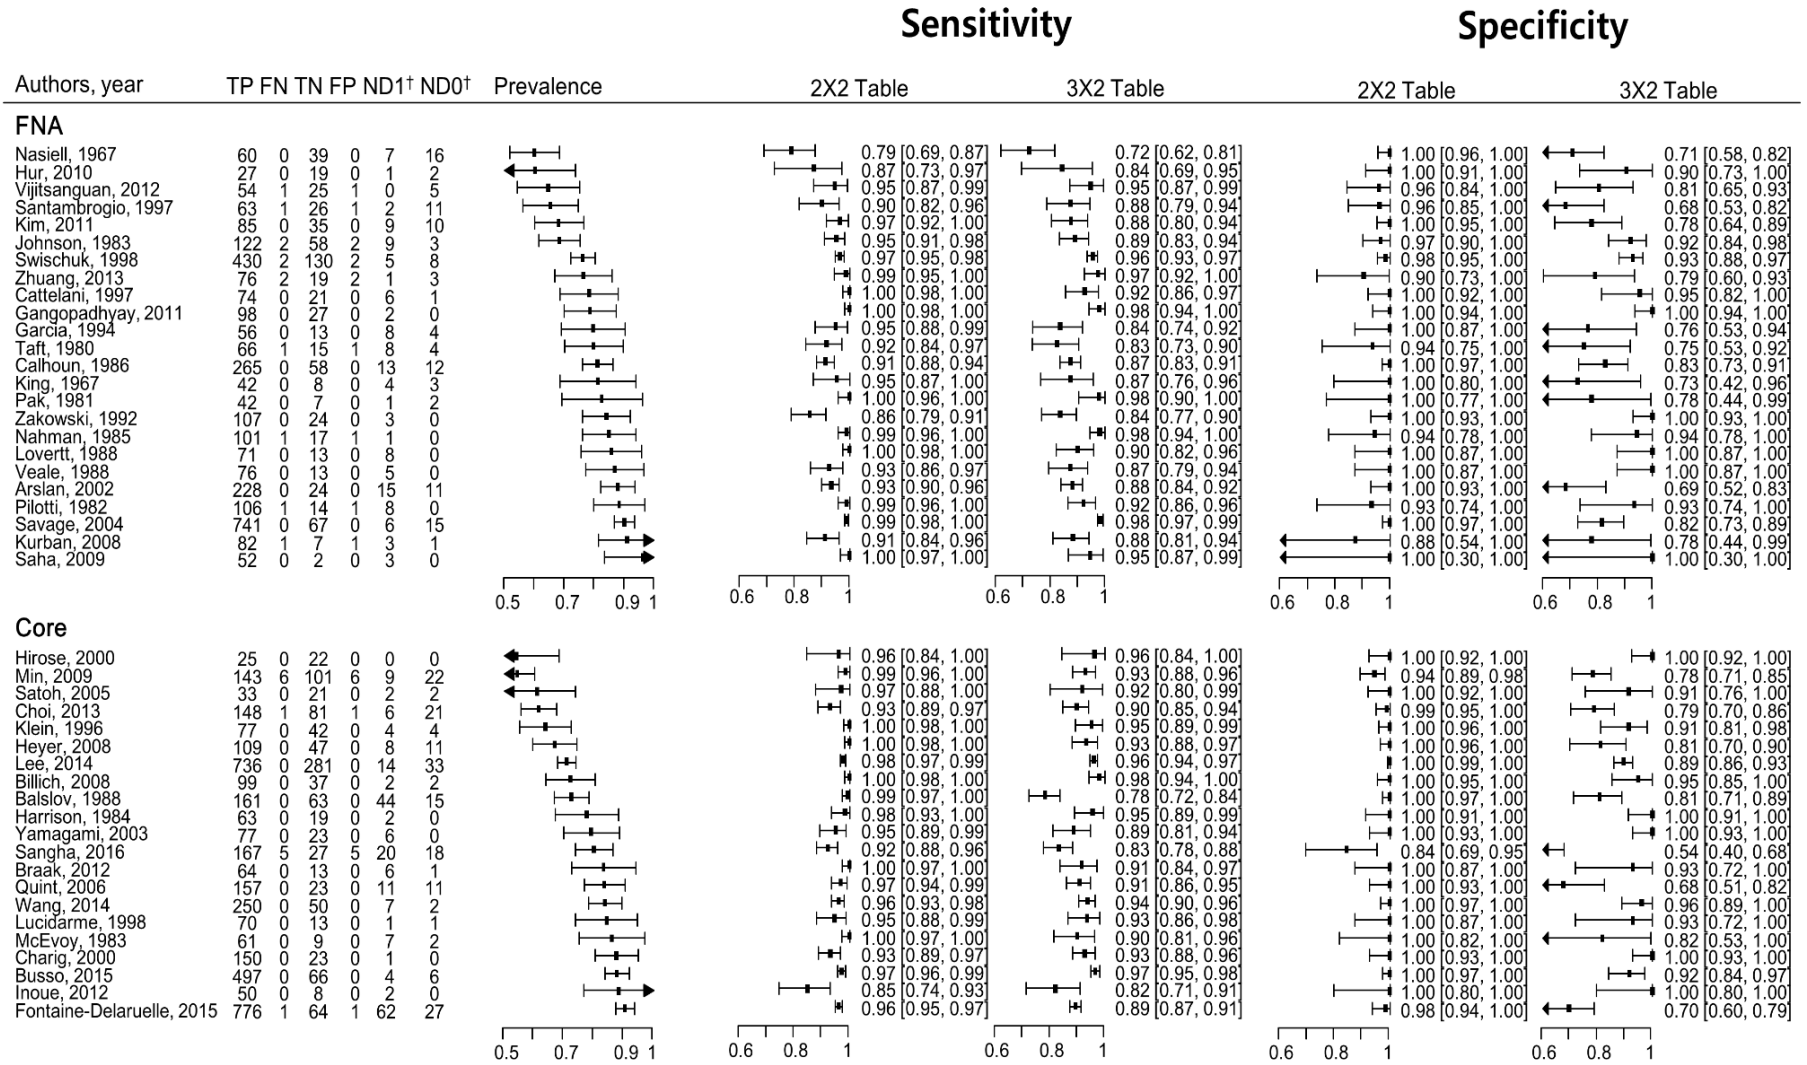

<sup>†</sup> ND1: # of non-diagnostic results in final malignancy  
<sup>‡</sup> ND0: # of non-diagnostic results in final benign

Supplemental Figure A3. Funnel plot for the incidence of non-diagnostic PTNB results

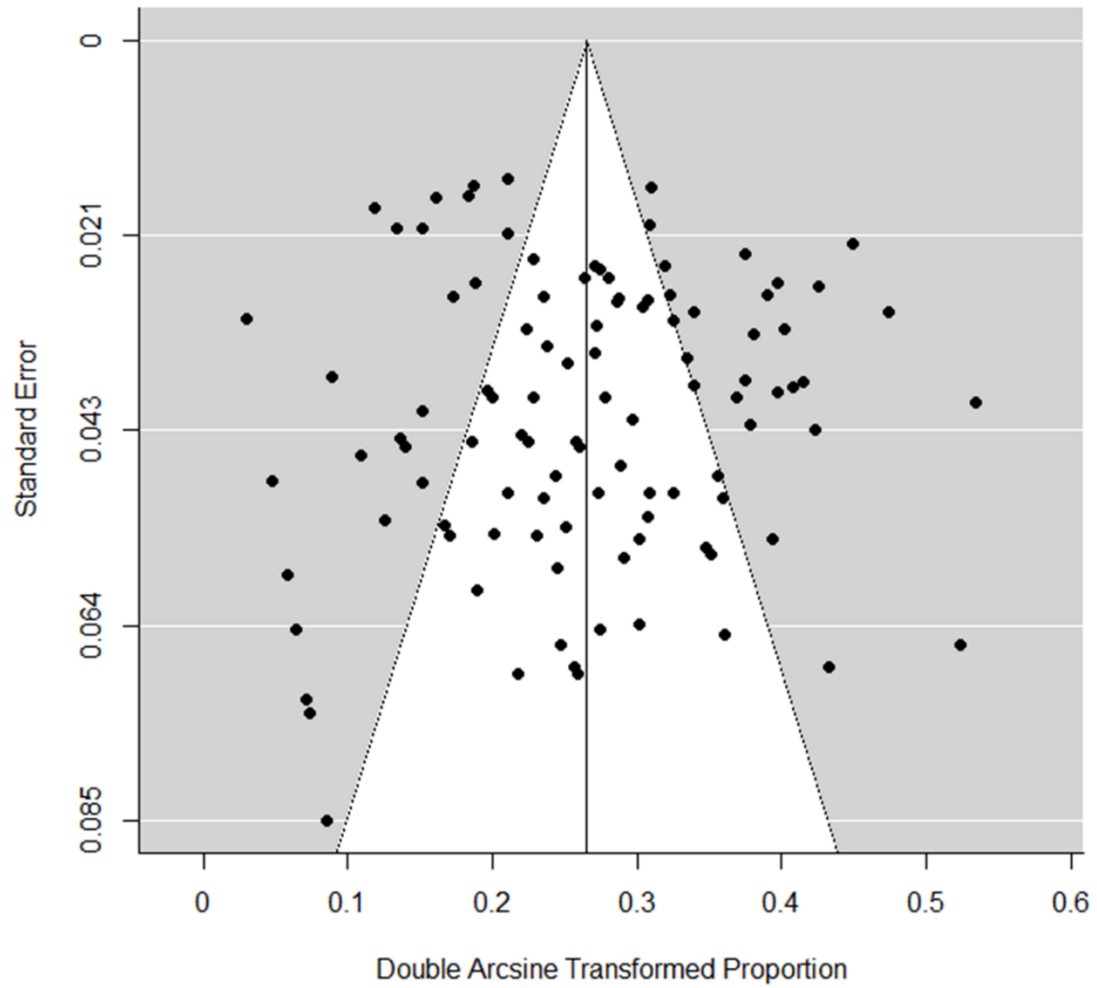

Supplement: 41598_2019_48805_MOESM1_ESM.pdf [file 41598_2019_48805_MOESM1_ESM.pdf]
